# Supplementary material
Source: Springer Nature journal article supplement (https://www.springermedizin.de/resource/supplementary/12891_2005_212_MOESM3_ESM.pdf/9510752)

pain

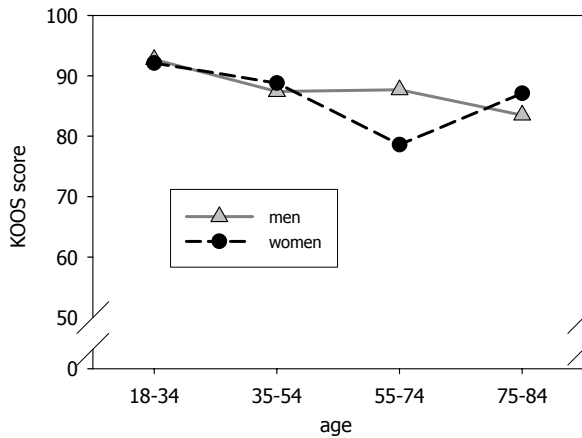

symptoms

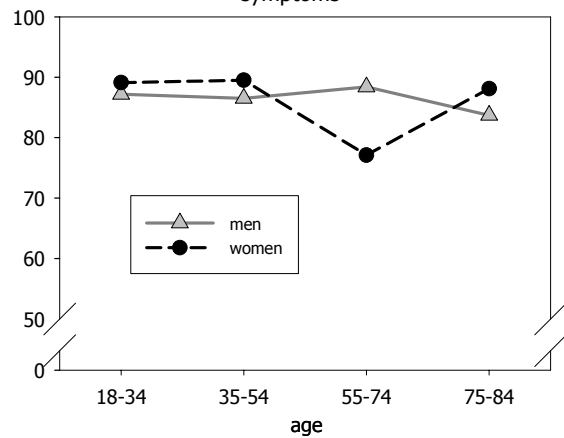

ADL

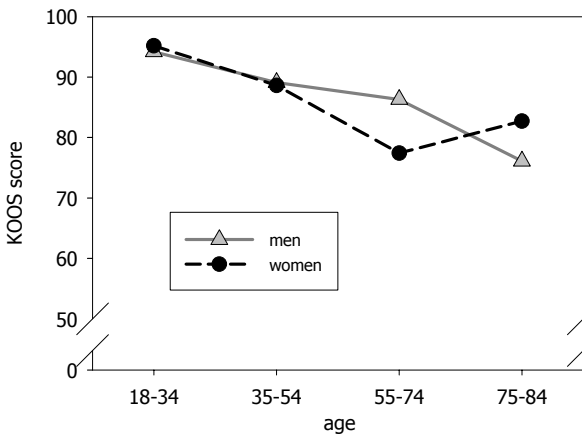

sports/recreation

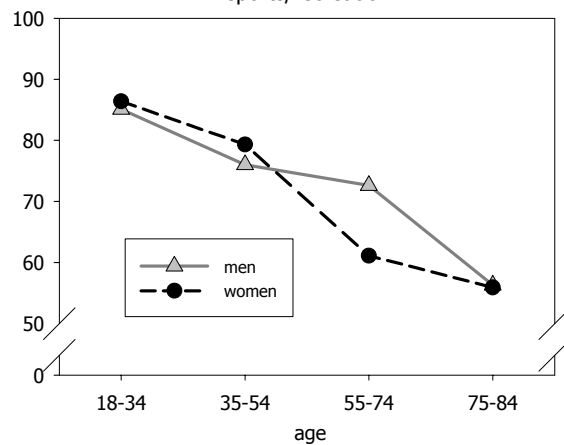

QOL

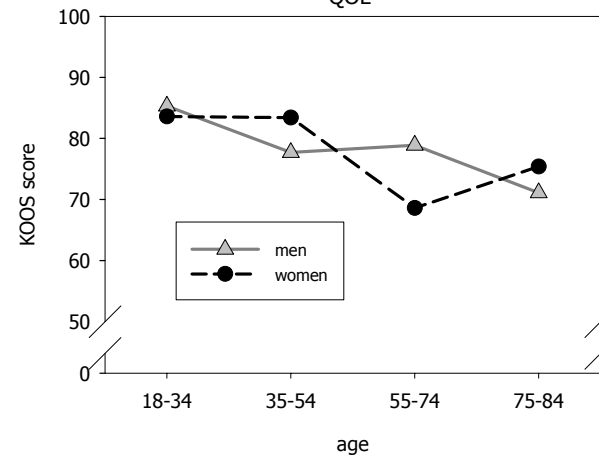

Supplement: MOESM3 [file 9510752]
